# Supplementary material for: Photoacoustic Detection of H2 and NH3 Using Plasmonic Signal Enhancement in GaN Microcantilevers
Source: MDPI journal article supplement (doi:10.3390/mi11070680), 2020-07-13
Supplement: s1 [file s1]

# Supplementary Materials: Photoacoustic Detection of H<sub>2</sub> and NH<sub>3</sub> Using Plasmonic Signal Enhancement in GaN Microcantilevers

Digangana Khan <sup>1,\*</sup>, Hongmei Li <sup>1</sup>, Ferhat Bayram <sup>1</sup>, Durga Gajula <sup>2</sup> and Goutam Koley <sup>1</sup>

<sup>1</sup> Holcombe Department of Electrical and Computer Engineering, Clemson University, Clemson, SC 29634, USA; hongmel@g.clemson.edu (H.L.); [fbayram@g.clemson.edu](mailto:fbayram@g.clemson.edu) (F.B.); [gkoley@clemson.edu](mailto:gkoley@clemson.edu) (G.K.)

<sup>2</sup> School of Electrical and Computer Engineering, Georgia Institute of Technology, Atlanta, GA 30332, USA; [gdraophy@gmail.com](mailto:gdraophy@gmail.com)

\* Correspondence: [digangk@g.clemson.edu](mailto:digangk@g.clemson.edu); Tel.: +1-(864)-656-4698

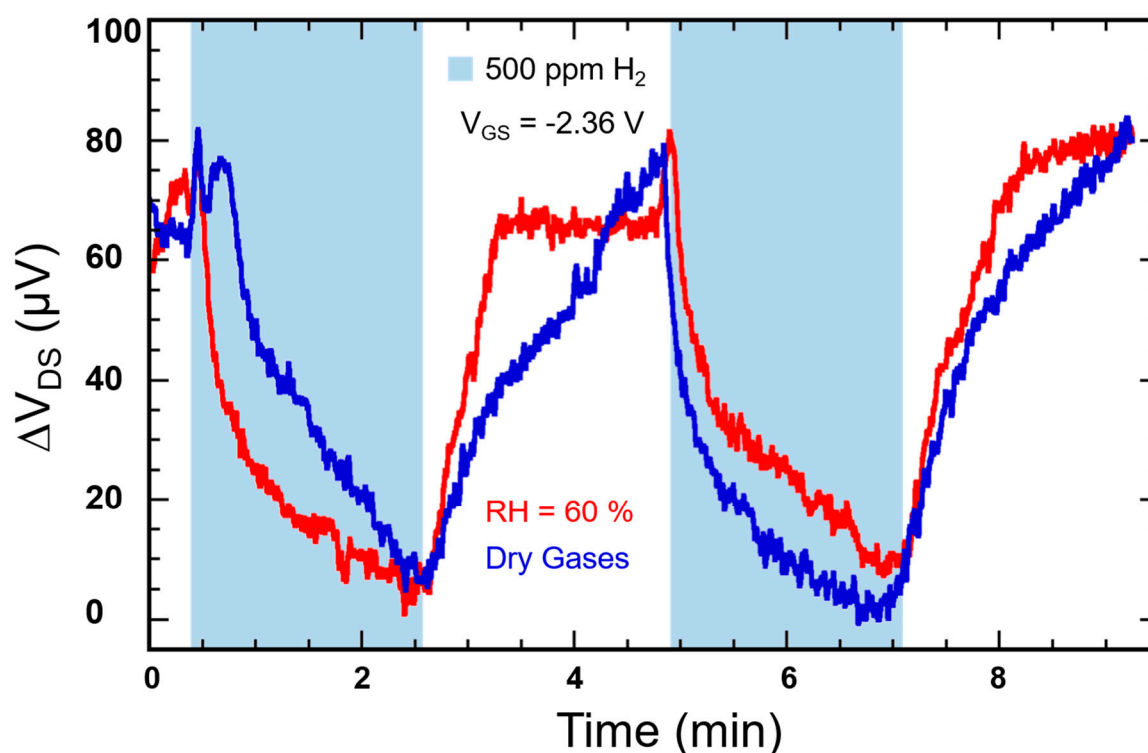

**Figure S1.** Response of the Pd coated device to 500 ppm H<sub>2</sub> diluted in UHP N<sub>2</sub> and in ambient air with 60% relative humidity. Clear improvement in response is observed for air dilution.
